# Supplementary material for: Clinical Differences in Triple-Positive Operable Breast Cancer Subtypes in Korean Patients: An Analysis of Korean Breast Cancer Registry Data
Source: PubMed Central journal article supplement — J Breast Cancer. 2018 Nov 23;21(4):415–24. doi: 10.4048/jbc.2018.21.e53 (PMC6310716; doi:10.4048/jbc.2018.21.e53), 2018-11-23
Supplement: jbc-21-415-s001.pdf [file jbc-21-415-s001.pdf]

Clinical Differences in Triple-Positive Breast Cancer Subtype

**Supplementary Table 1.** Baseline characteristics of patients included in the data registry of the Seoul St. Mary's Hospital of the Catholic Medical Center

| Characteristic           | Subtype                               |                                 |                                     |                                              | p-value            |
|--------------------------|---------------------------------------|---------------------------------|-------------------------------------|----------------------------------------------|--------------------|
|                          | Triple-positive<br>(n=169)<br>No. (%) | Luminal A<br>(n=724)<br>No. (%) | HER2-enriched<br>(n=206)<br>No. (%) | Luminal B with HER2(-)<br>(n=668)<br>No. (%) |                    |
| Age at diagnosis (yr)    |                                       |                                 |                                     |                                              | <0.001             |
| <40                      | 26 (15.4)                             | 64 (8.8)                        | 19 (9.2)                            | 81 (12.1)                                    |                    |
| 40-49                    | 66 (39.1)                             | 252 (34.8)                      | 42 (20.4)                           | 241 (36.1)                                   |                    |
| 50-59                    | 44 (26.0)                             | 232 (32.0)                      | 102 (49.5)                          | 200 (29.9)                                   |                    |
| ≥60                      | 33 (19.5)                             | 176 (24.2)                      | 43 (20.9)                           | 146 (21.9)                                   |                    |
| BMI (kg/m <sup>2</sup> ) |                                       |                                 |                                     |                                              | 0.389              |
| <18.5                    | 8 (4.7)                               | 29 (4.0)                        | 5 (2.4)                             | 24 (3.6)                                     |                    |
| 18.5-22.9                | 83 (49.1)                             | 326 (45.0)                      | 81 (39.3)                           | 274 (41.0)                                   |                    |
| 23-24.9                  | 37 (21.9)                             | 166 (22.9)                      | 50 (24.3)                           | 155 (23.2)                                   |                    |
| ≥25                      | 41 (24.3)                             | 203 (28.0)                      | 70 (34.0)                           | 215 (32.2)                                   |                    |
| pT stage                 |                                       |                                 |                                     |                                              | <0.001             |
| T1                       | 91 (53.8)                             | 528 (72.9)                      | 104 (50.5)                          | 390 (58.4)                                   |                    |
| T2                       | 67 (39.6)                             | 165 (22.8)                      | 82 (39.8)                           | 248 (37.1)                                   |                    |
| T3                       | 8 (4.7)                               | 25 (3.5)                        | 16 (7.8)                            | 25 (3.7)                                     |                    |
| T4                       | 3 (1.8)                               | 3 (0.4)                         | 2 (1.0)                             | 2 (0.3)                                      |                    |
| Tis                      | 0                                     | 3 (0.4)                         | 2 (1.0)                             | 1 (0.1)                                      |                    |
| pN stage                 |                                       |                                 |                                     |                                              | 0.002              |
| N0                       | 97 (57.4)                             | 512 (70.7)                      | 117 (56.8)                          | 445 (66.6)                                   |                    |
| N1                       | 45 (26.6)                             | 151 (20.9)                      | 58 (28.2)                           | 162 (24.3)                                   |                    |
| N2                       | 15 (8.9)                              | 43 (5.9)                        | 18 (8.7)                            | 35 (5.2)                                     |                    |
| N3                       | 12 (7.1)                              | 18 (2.5)                        | 13 (6.3)                            | 26 (3.9)                                     |                    |
| TNM stage                |                                       |                                 |                                     |                                              | <0.001             |
| I                        | 64 (37.9)                             | 418 (57.7)                      | 75 (36.4)                           | 307 (46.0)                                   |                    |
| II                       | 76 (45.0)                             | 232 (32.0)                      | 95 (46.1)                           | 293 (43.9)                                   |                    |
| III                      | 29 (17.2)                             | 74 (10.2)                       | 36 (17.5)                           | 68 (10.2)                                    |                    |
| EGFR                     |                                       |                                 |                                     |                                              | <0.001             |
| Negative                 | 135 (86.0)                            | 638 (90.0)                      | 102 (51.5)                          | 553 (83.8)                                   |                    |
| Positive                 | 22 (14.0)                             | 71 (10.0)                       | 96 (48.5)                           | 107 (16.2)                                   |                    |
| Recurrence               | 11 (6.5)                              | 29 (4.0)                        | 22 (10.7)                           | 42 (6.3)                                     | 0.001              |
| Follow-up duration (mo)* | 36.79±23.97                           | 39.49±21.57                     | 35.95±20.33                         | 31.18±20.66                                  | 0.001 <sup>†</sup> |

HER2=human epidermal growth factor receptor 2; BMI=body mass index; EGFR=epidermal growth factor receptor.

\*Mean±SD; <sup>†</sup>One way ANOVA.
