# Supplementary material for: Clinical Differences in Triple-Positive Operable Breast Cancer Subtypes in Korean Patients: An Analysis of Korean Breast Cancer Registry Data
Source: PubMed Central journal article supplement — J Breast Cancer. 2018 Nov 23;21(4):415–24. doi: 10.4048/jbc.2018.21.e53 (PMC6310716; doi:10.4048/jbc.2018.21.e53), 2018-11-23
Supplement: jbc-21-415-s002.pdf [file jbc-21-415-s002.pdf]

**Supplementary Table 2.** Trastuzumab efficacy for triple-positive breast cancer in CMC data according to the stage

| Stage | RFS*                  | <i>p</i> -value |
|-------|-----------------------|-----------------|
| I     | Log-rank (Mantel-Cox) | Not assessed    |
| II    | Log-rank (Mantel-Cox) | 0.738           |
| III   | Log-rank (Mantel-Cox) | 0.356           |

CMC=Seoul St. Mary's Hospital of the Catholic Medical Center; RFS= recurrence-free survival.

\*Kaplan-Meier survival analysis of RFS.
