# Supplementary material for: Clinical Differences in Triple-Positive Operable Breast Cancer Subtypes in Korean Patients: An Analysis of Korean Breast Cancer Registry Data
Source: PubMed Central journal article supplement — J Breast Cancer. 2018 Nov 23;21(4):415–24. doi: 10.4048/jbc.2018.21.e53 (PMC6310716; doi:10.4048/jbc.2018.21.e53), 2018-11-23
Supplement: jbc-21-415-s003.pdf [file jbc-21-415-s003.pdf]

Clinical Differences in Triple-Positive Breast Cancer Subtype

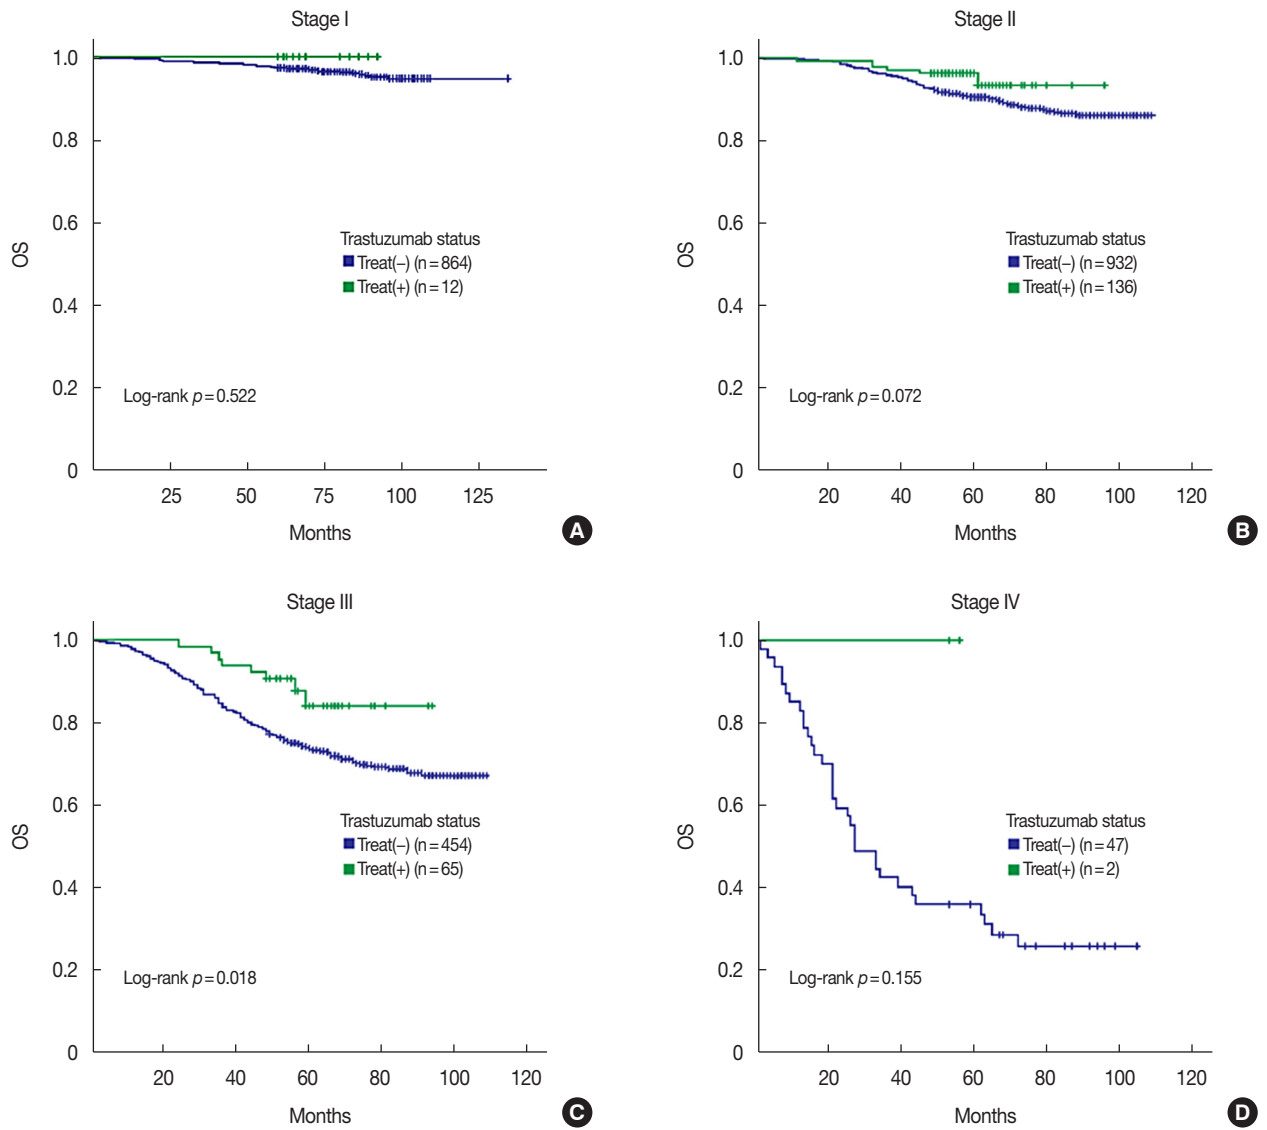

**Supplementary Figure 1.** Efficacy of trastuzumab for human epidermal growth factor receptor 2 (HER2)-enriched breast cancer in the Korean Breast Cancer Society cohort (2006–2010). Cases were staged according to the 7th edition of the American Joint Committee on Cancer staging system for breast cancer. Overall survival (OS) was estimated using Kaplan-Meier survival analysis. (A) Stage I, (B) stage II, (C) stage III, and (D) stage IV.
